# Supplementary material for: Layered MoxBy (MBenes) derived by a molten-salt method and their application in advanced LIB anodes
Source: Royal Society of Chemistry journal article supplement (doi:10.1039/d4ta00913d), 2024-01-01
Supplement: d4ta00913d1.pdf [file d4ta00913d1.pdf]

# Accordion-like $\text{Mo}_x\text{B}_y$ (MBene) derived from molten-salts method and its application in advanced LIBs anode

Yi-Zhao Chen<sup>1</sup>, Ting-Ting Mao<sup>1</sup>, Song-Yi Liao<sup>2, \*</sup>, Selina X. Yao<sup>3</sup> and Yong-Gang Min<sup>1, 2, \*</sup>

<sup>1</sup>School of Materials and Energy, Guangdong University of Technology, Guangzhou, Guangdong 510006, PR China

<sup>2</sup>College of Chemistry and Chemical Engineering, Zhongkai University of Agriculture and Engineering, Guangzhou, Guangdong 510225, PR China

<sup>3</sup>Department of Mechanical Engineering, University of Vermont, Burlington, Vermont, 05405, USA

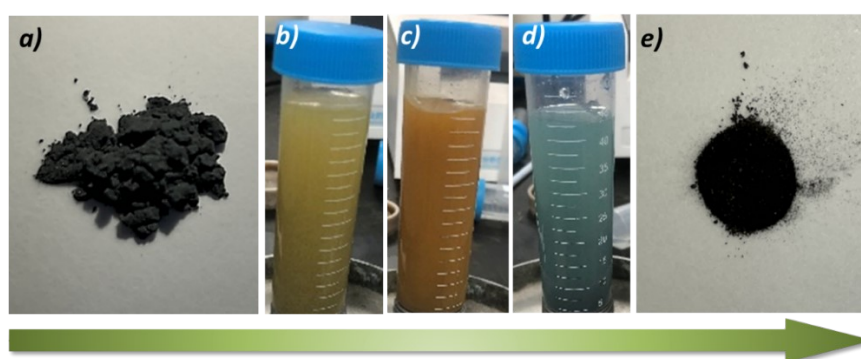

**Figure S1** Optical images of a) MoAlB, the solution of calcined mixture after washing and centrifugation b) for the first time, c) for several time with deionized water and d) being treated by  $0.1 \text{ mol L}^{-1}$  APS and d) the final product of MBene ( $\text{Mo}_x\text{B}_y$ ) powder.

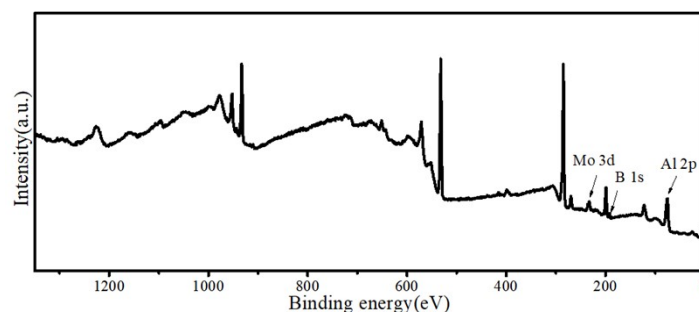

**Figure S2** X-ray photoelectron survey spectroscopy of MBene-620

\*E-mail addresses: liaosongyi@zhku.edu.cn; ygmin@gdut.edu.cn;  
Tel. number: +86 17673116748; +86 18651590988;

**Table S1** Analysis report of EDS results for the sample of MBene

| Elt. | Line | Intensity (c/s) | Atomic (%) | Conc.   |
|------|------|-----------------|------------|---------|
| B    | Ka   | 29.56           | 26.239     | 4.160   |
| Na   | Ka   | 6.49            | 0.851      | 0.287   |
| Al   | Ka   | 75.19           | 6.394      | 2.530   |
| Cl   | Ka   | 0.00            | 0.000      | 0.000   |
| K    | Ka   | 1.07            | 0.112      | 0.064   |
| Cu   | Ka   | 3.15            | 0.978      | 0.911   |
| Mo   | La   | 851.63          | 65.426     | 92.048  |
|      |      |                 | 100.000    | 100.000 |

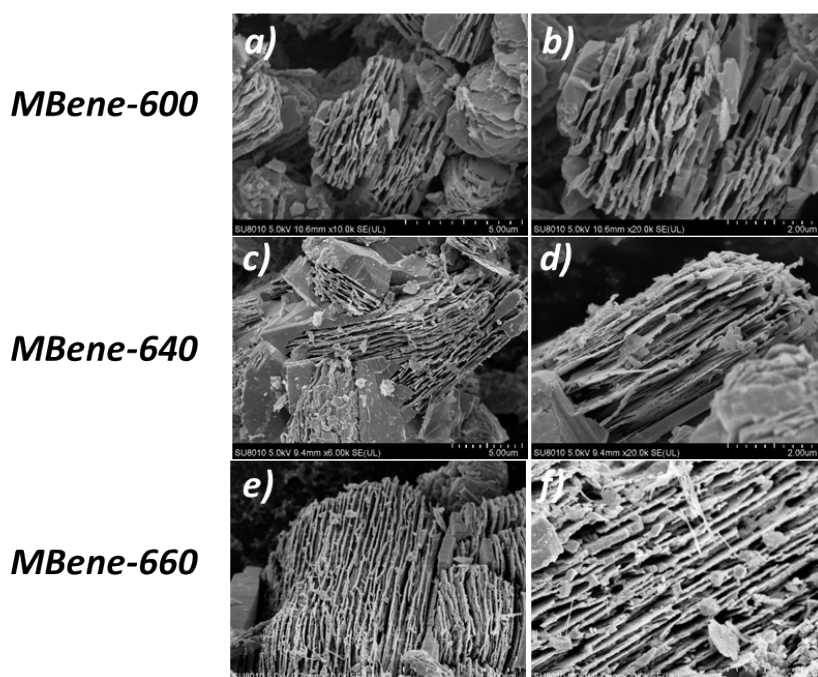

**Figure S3** SEM images of a~b) MBene-600, b-d) MBene-640 and e~f) MBene-660
